# Supplementary material
Source: HighWire-hosted journal article supplement (https://bmjopen.bmj.com/content/11/7/e043982)
Supplement: inline-supplementary-material-2 [file inline-supplementary-material-2.pdf]

### Appendix 1 – Search strategy for Scopus

(TITLE-ABS-KEY(“acute care” OR hospital) AND TITLE-ABS-KEY(“quality culture” OR “safety culture” OR “culture of safety” OR “safety climate” OR “safety attitude”) AND TITLE-ABS-KEY(survey OR questionnaire OR tool OR instrument OR measur\* OR assess\* OR checklist OR “check list” OR observ\*) AND TITLE-ABS-KEY(“patient safety” OR “public safety” OR “workplace safety”)

2008- May 2020 = 1289 citations
